# Supplementary material for: The Effect of New Zealand Kanuka, Manuka and Clover Honeys on Bacterial Growth Dynamics and Cellular Morphology Varies According to the Species
Source: PubMed Central journal article supplement (PMC3572166; doi:10.1371/journal.pone.0055898), 2013-02-13

*B. subtilis*

No catalase

+ Catalase

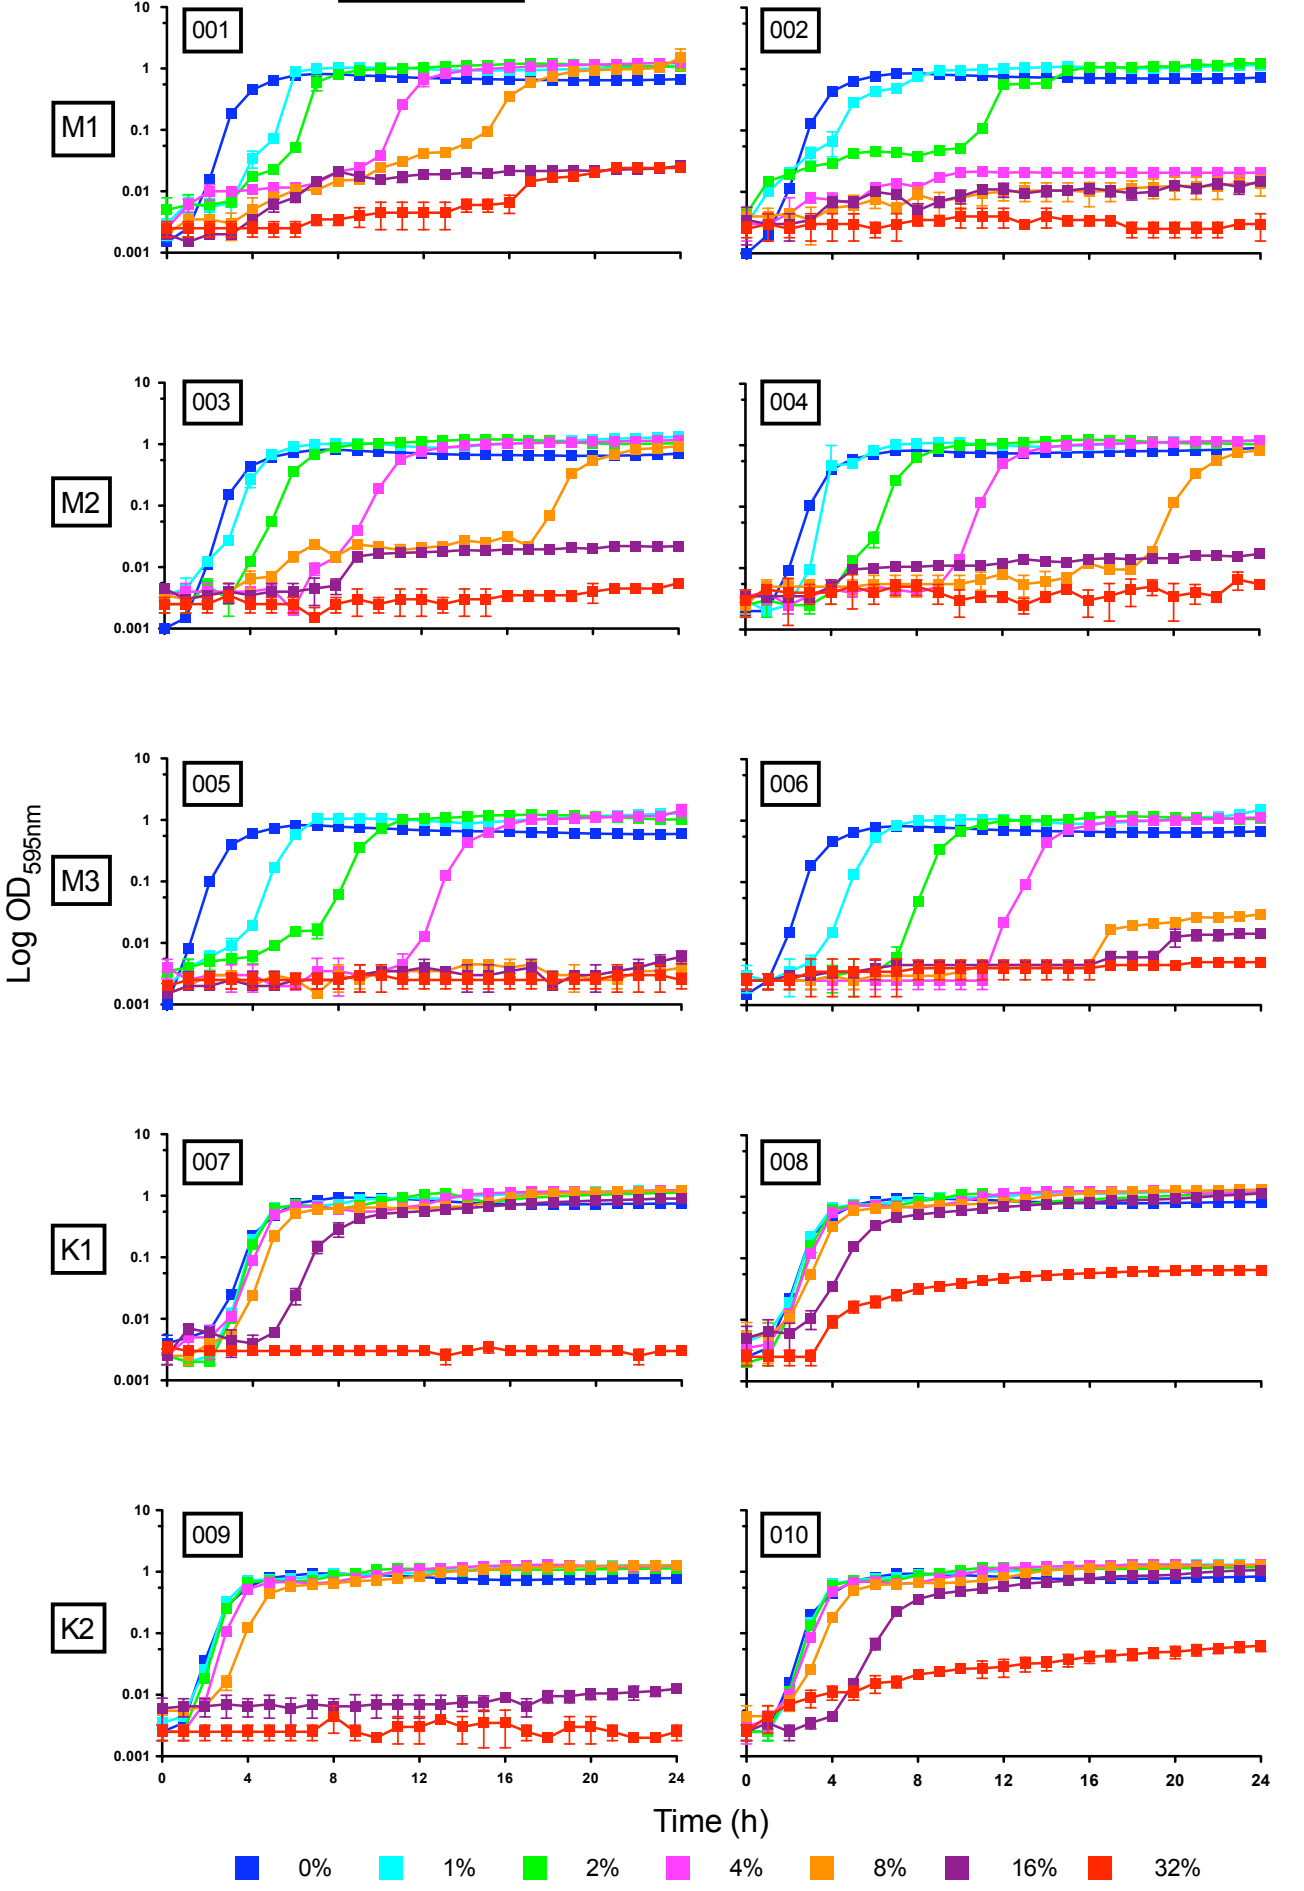

0% 1% 2% 4% 8% 16% 32%

*B. subtilis*

No catalase

+ Catalase

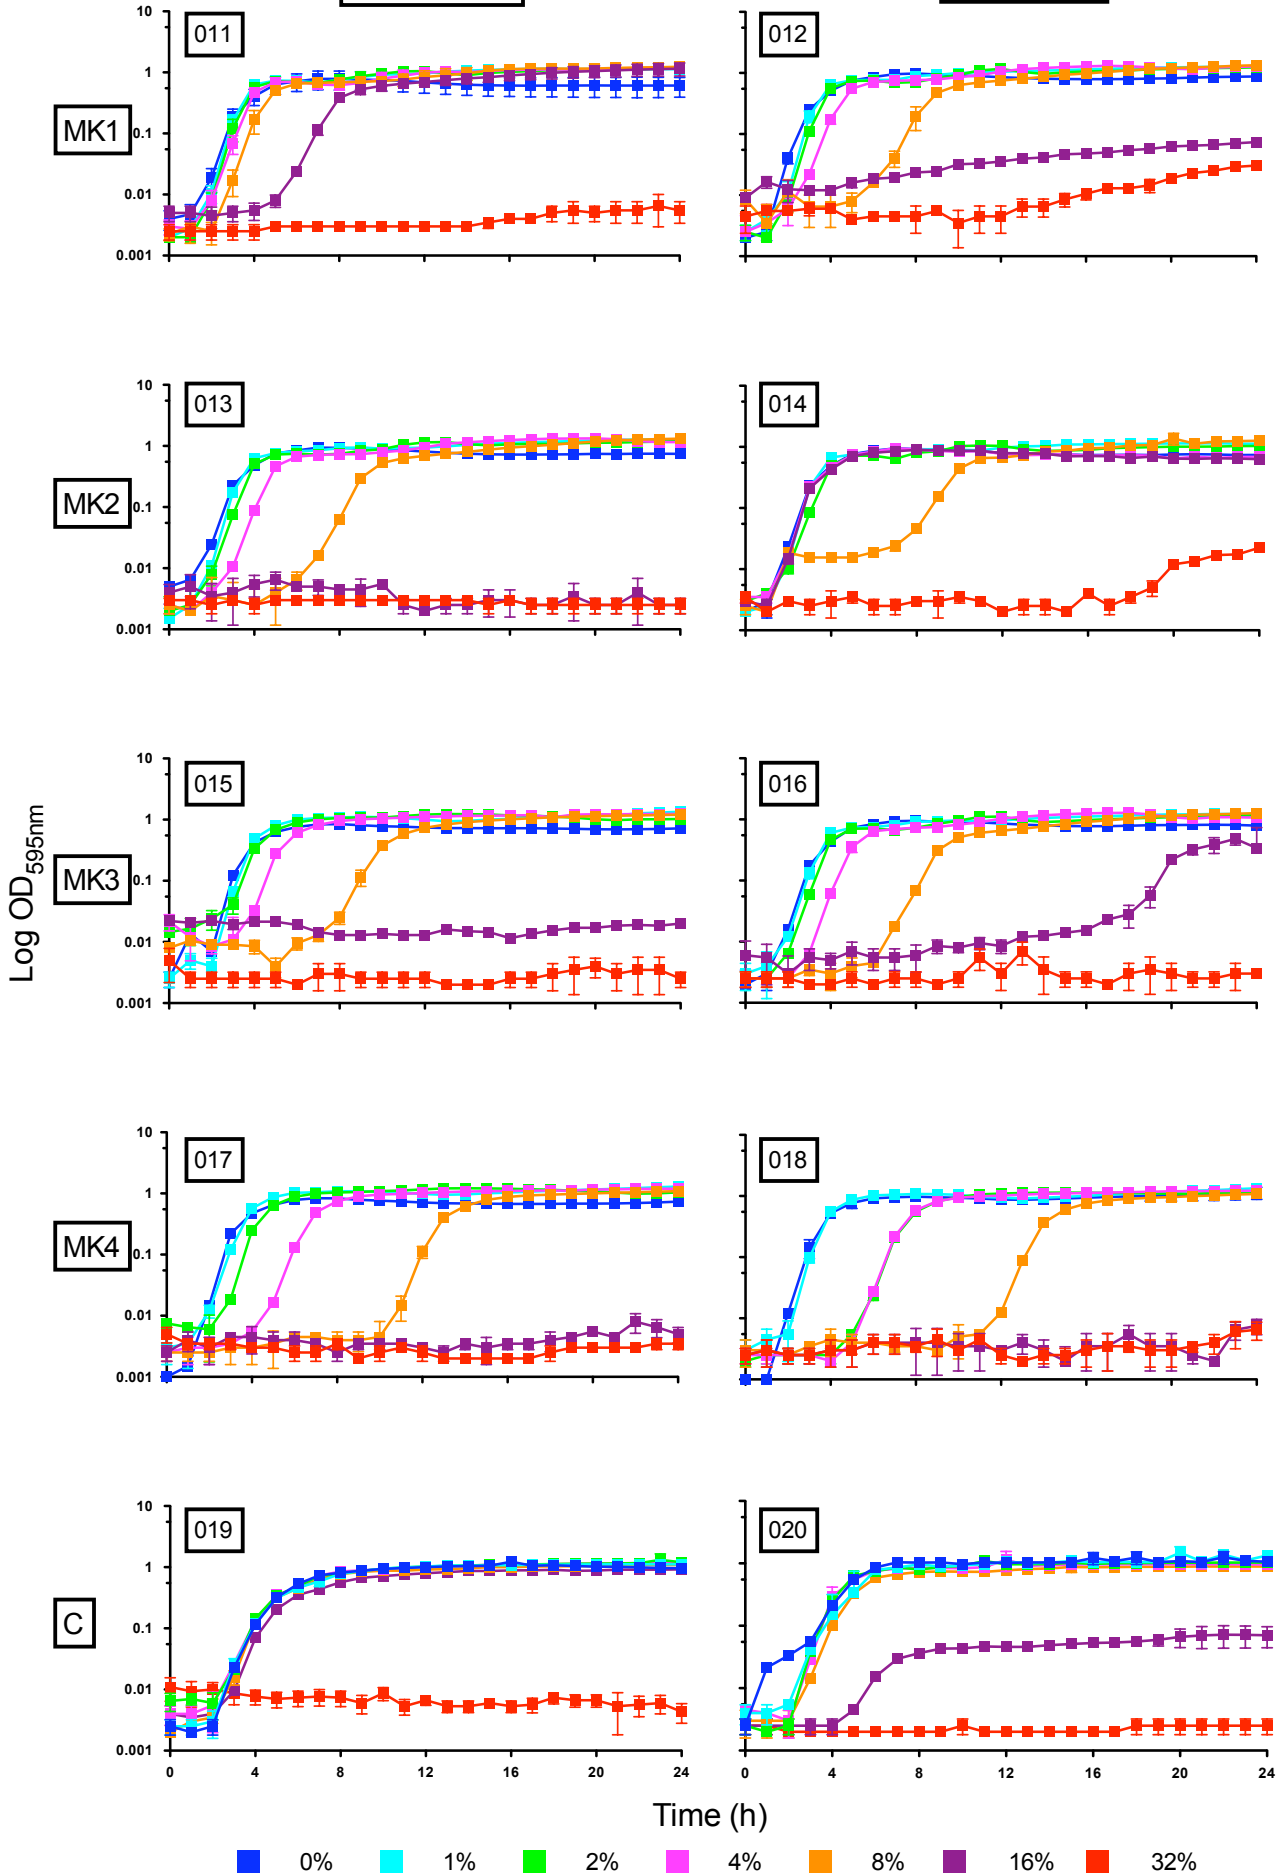

Time (h)

0% 1% 2% 4% 8% 16% 32%

*B. subtilis*

No catalase

+ Catalase

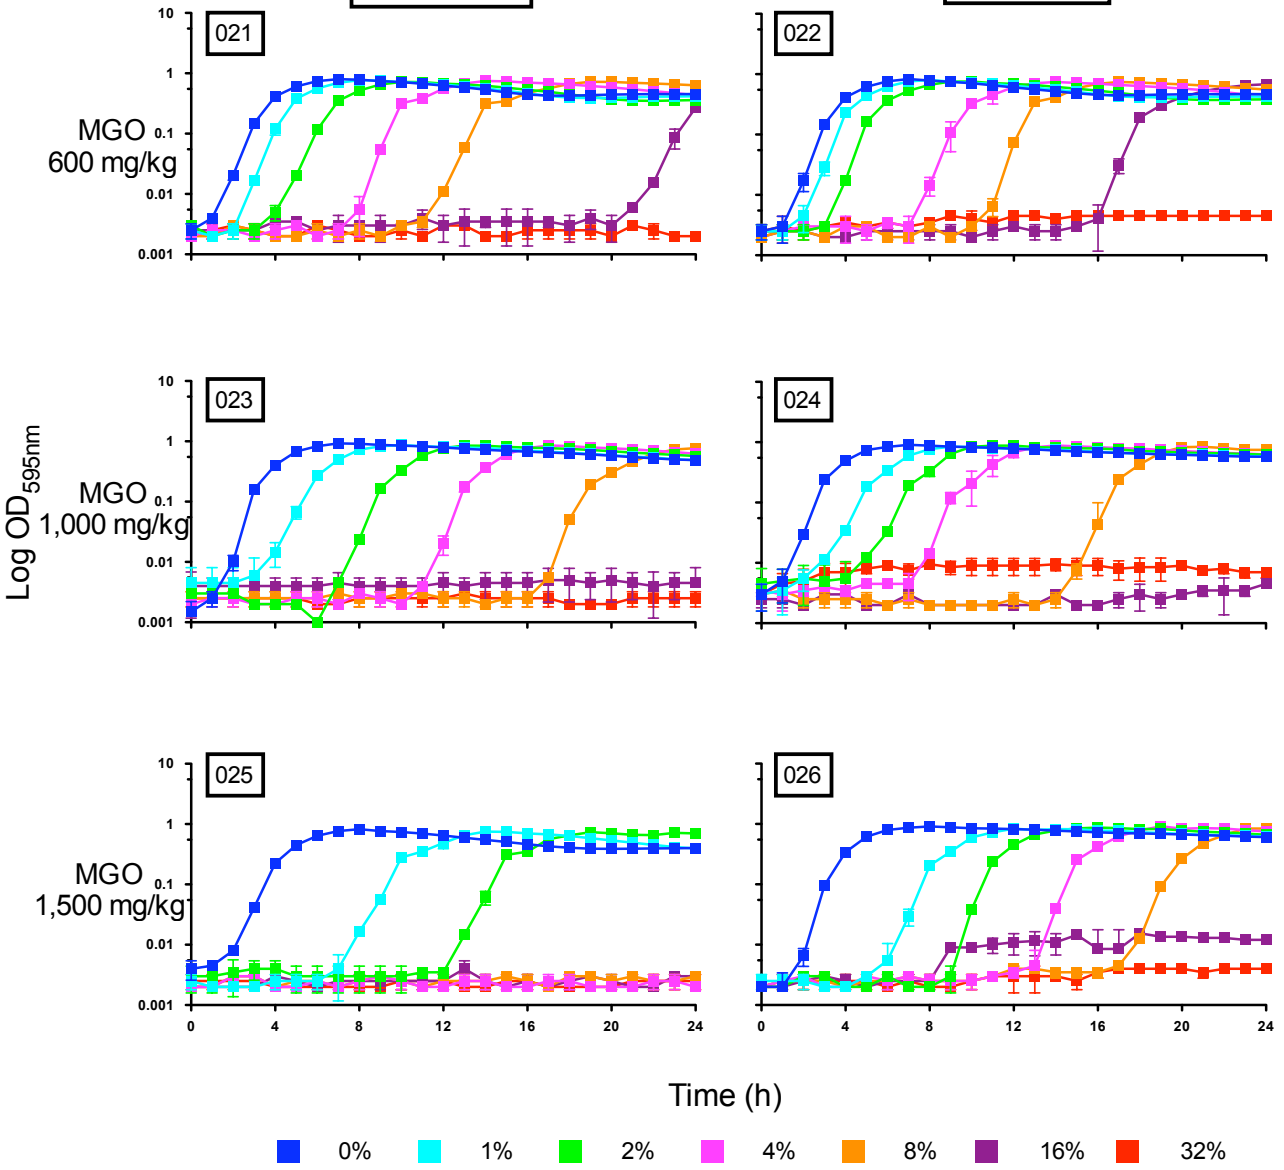

Time (h)

- 0% (blue)
- 1% (cyan)
- 2% (green)
- 4% (magenta)
- 8% (orange)
- 16% (purple)
- 32% (red)

*B. subtilis*

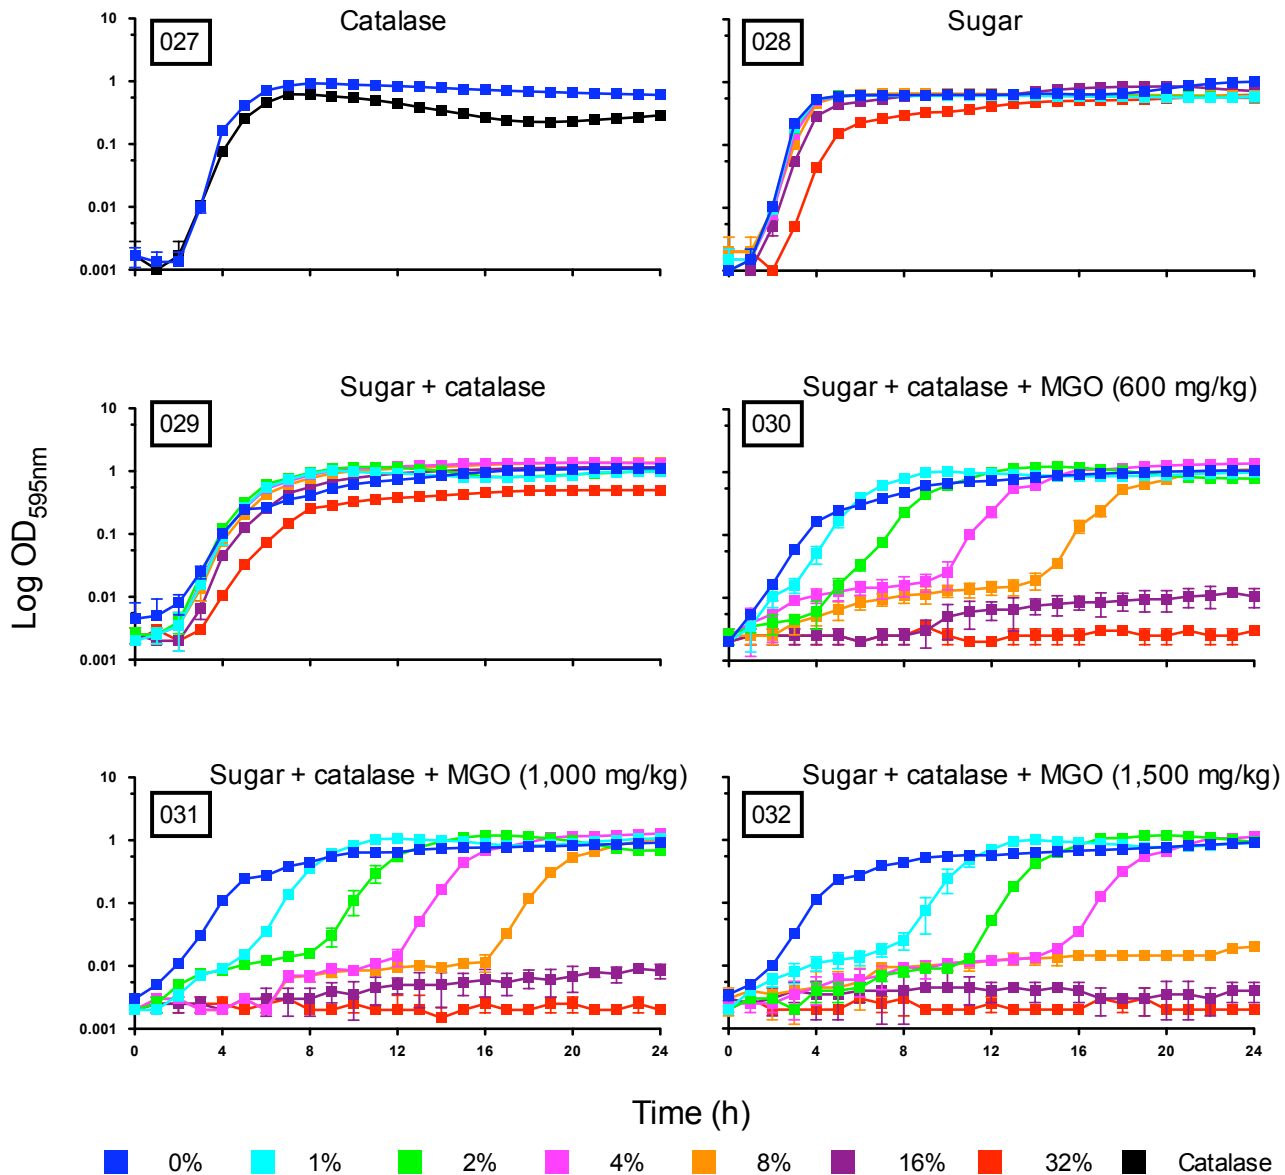

0% 1% 2% 4% 8% 16% 32% Catalase

*E. coli*

No catalase

+ Catalase

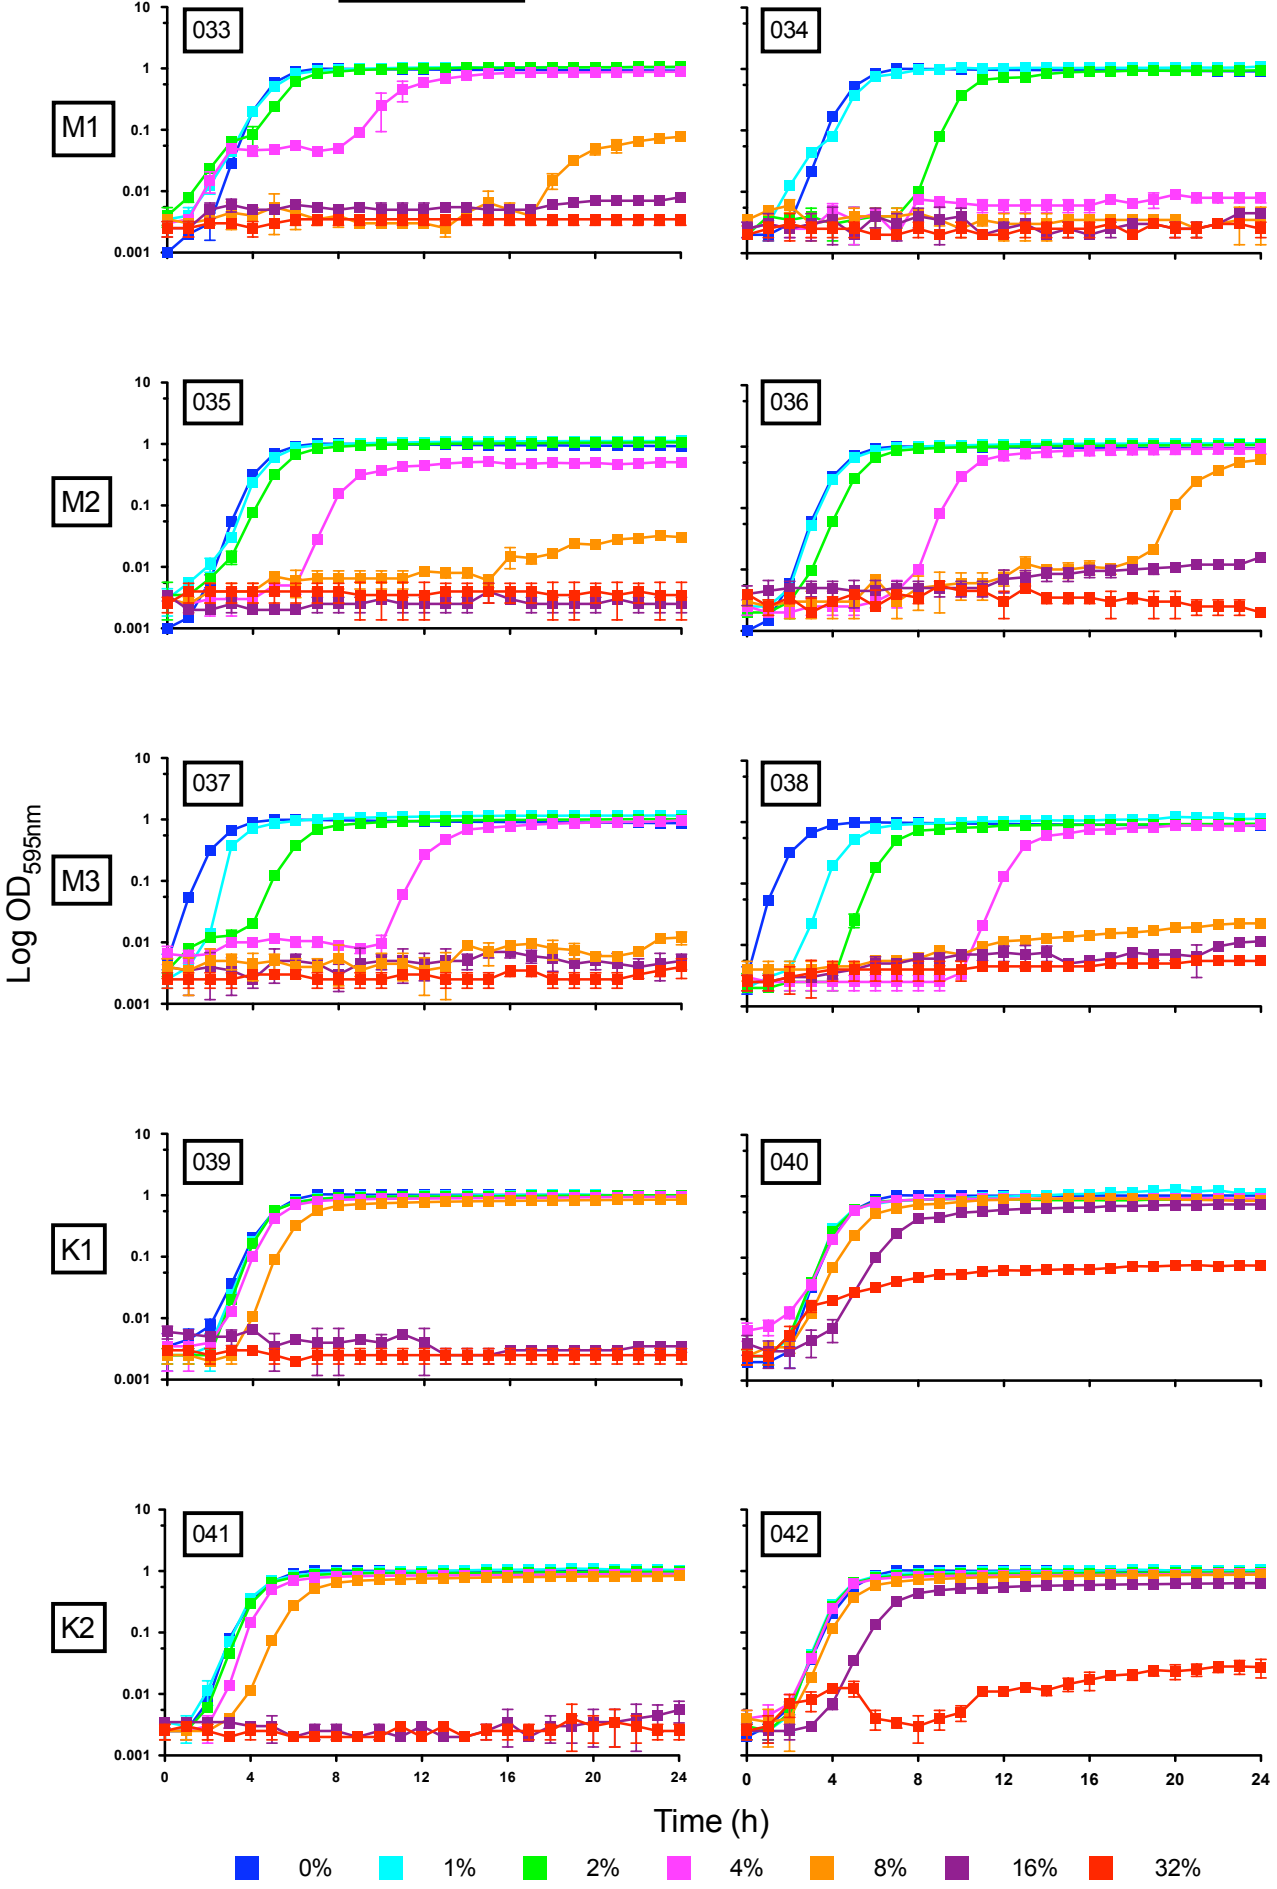

*E. coli*

No catalase

+ Catalase

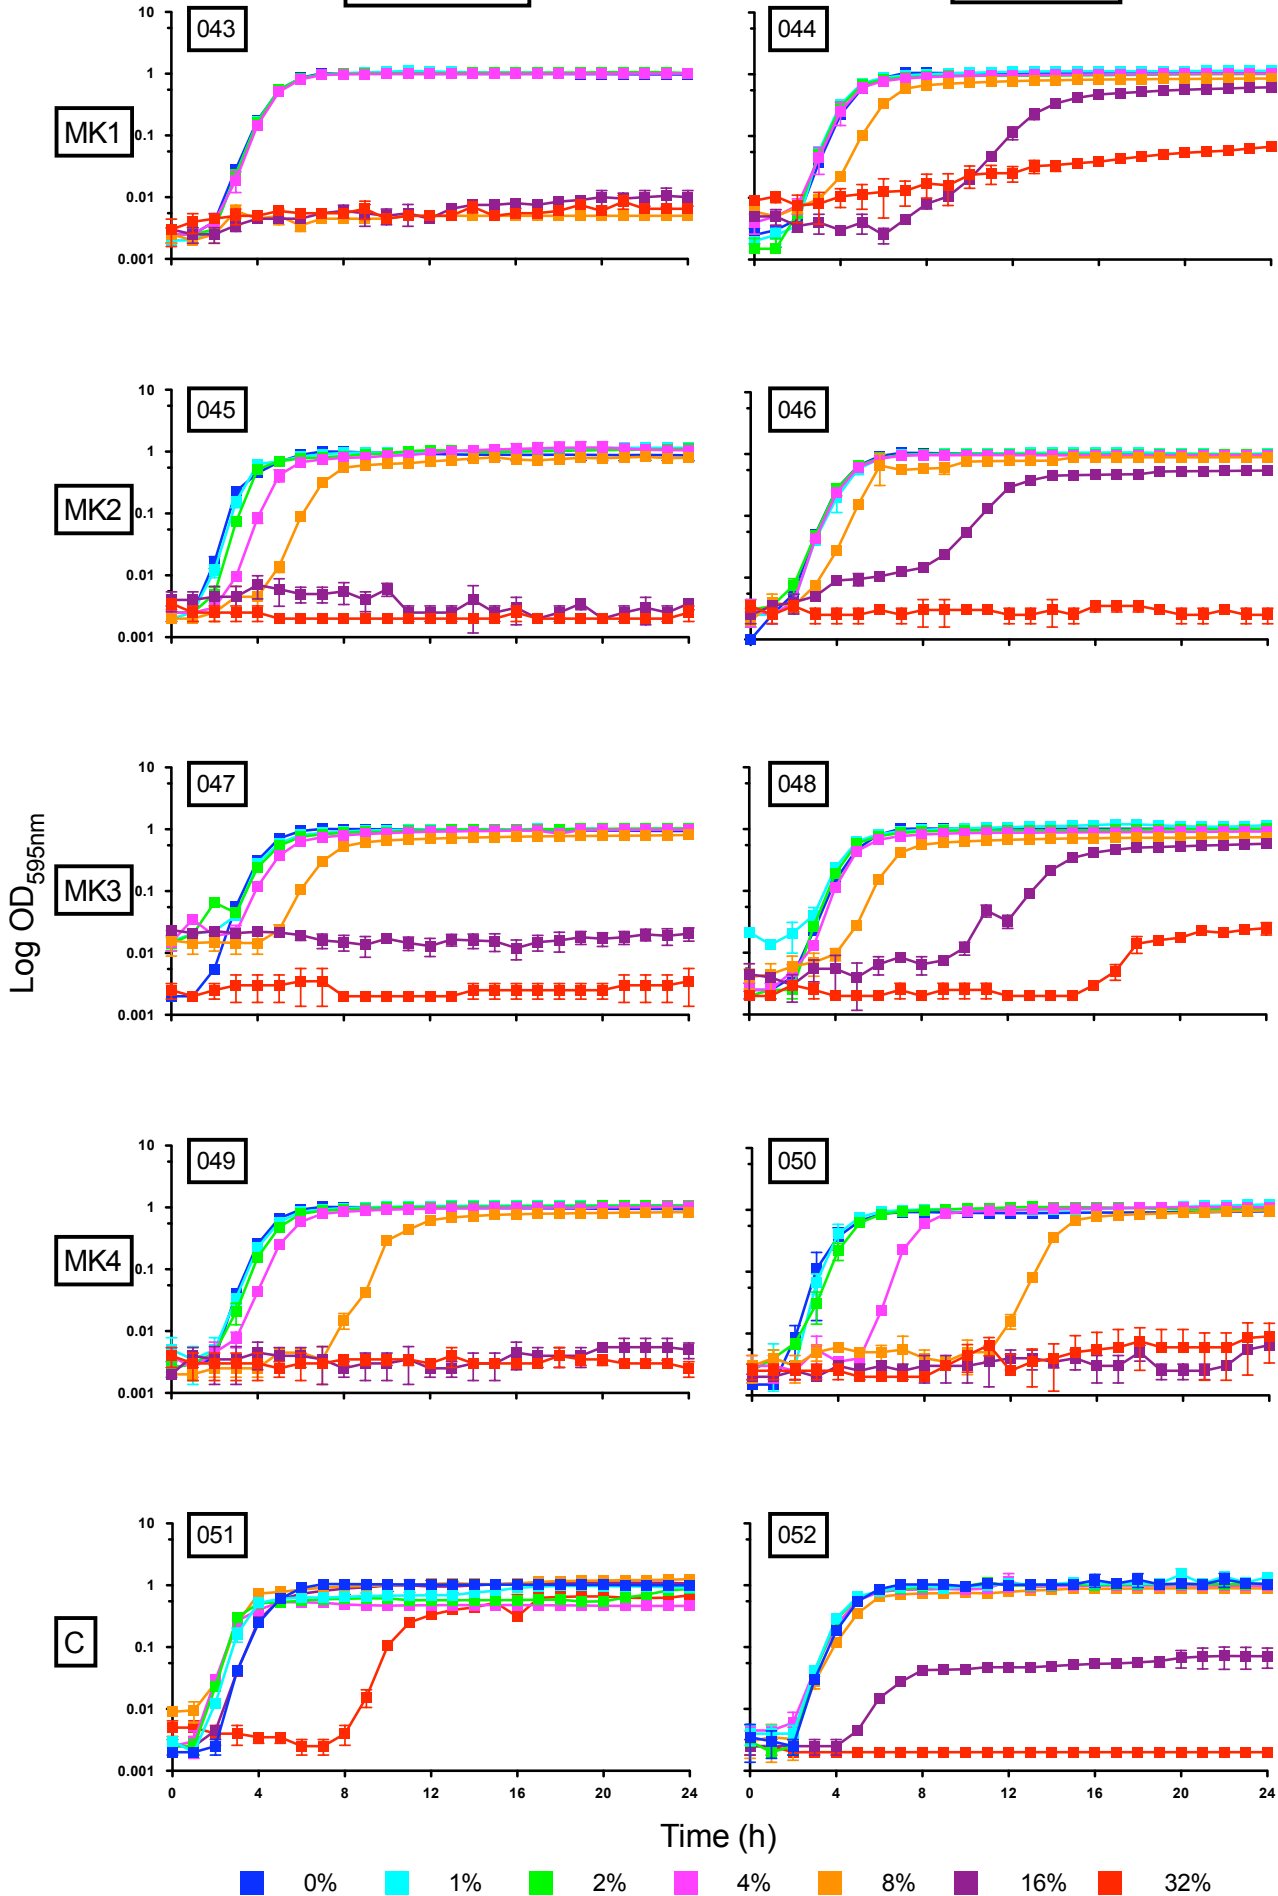

*E. coli*

No catalase

+ Catalase

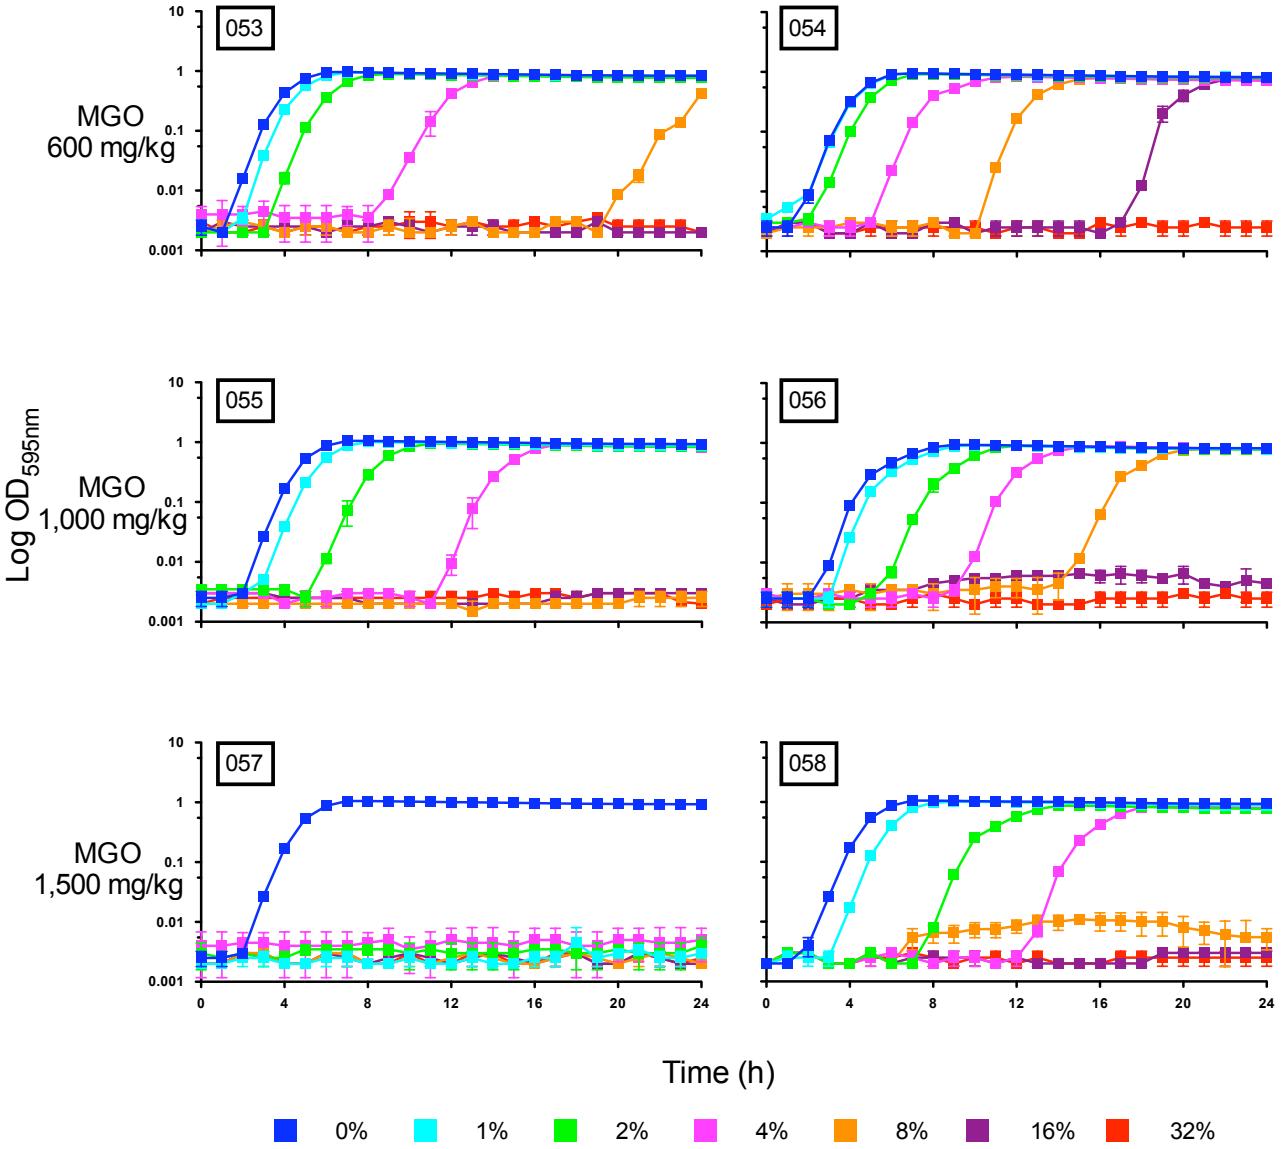

*E. coli*

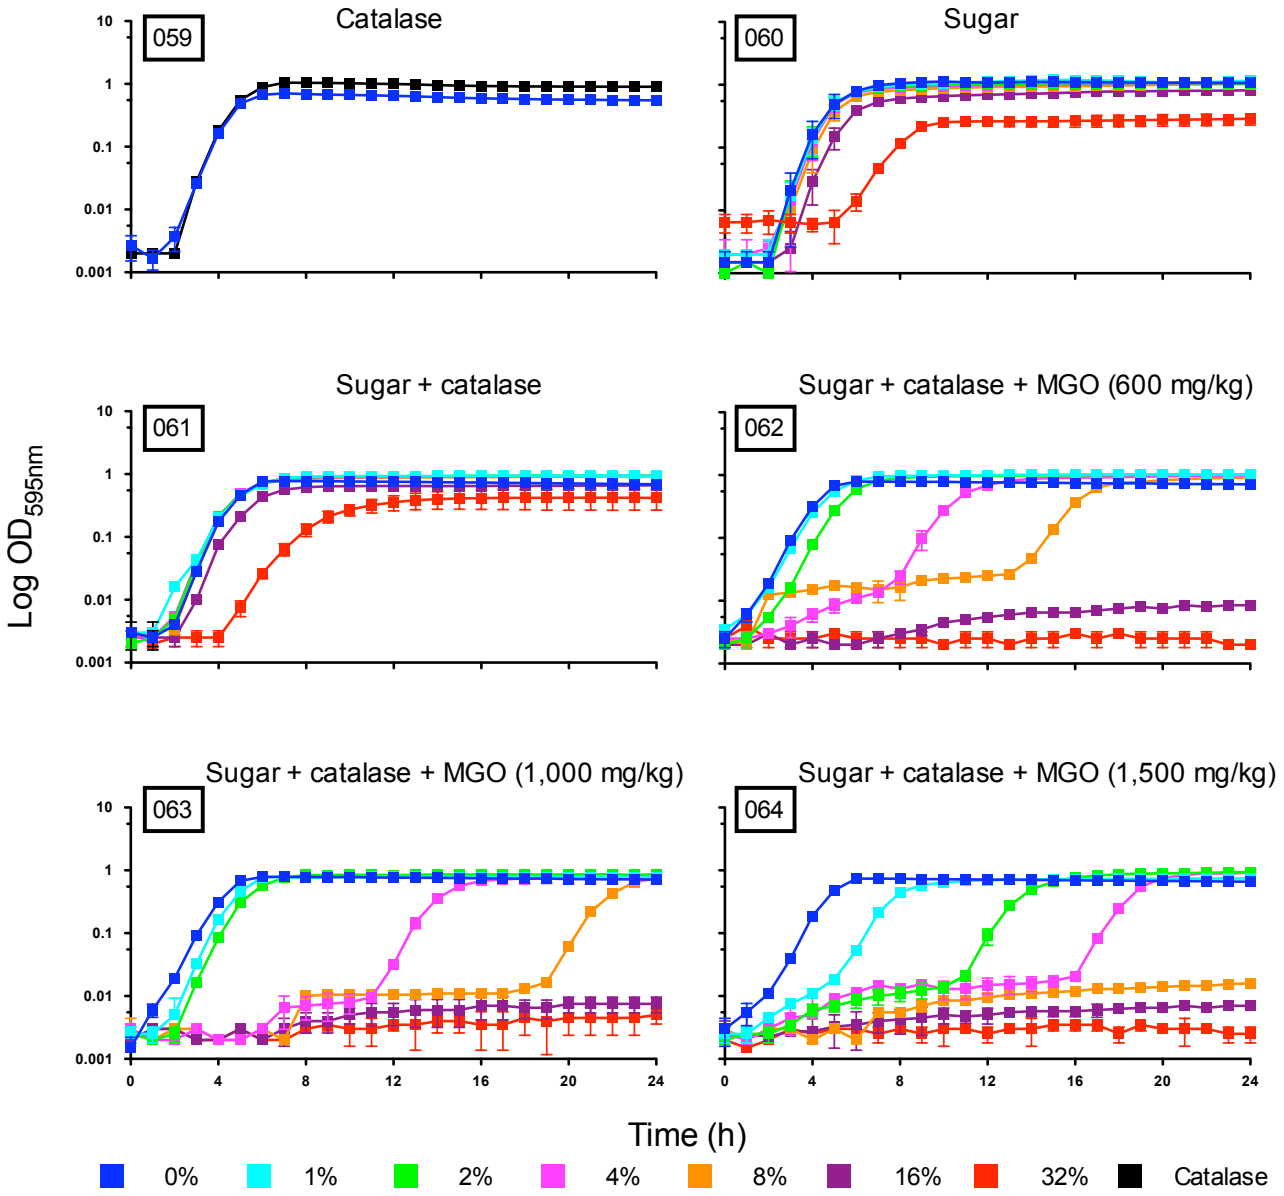



*S. aureus*

No catalase

+ Catalase

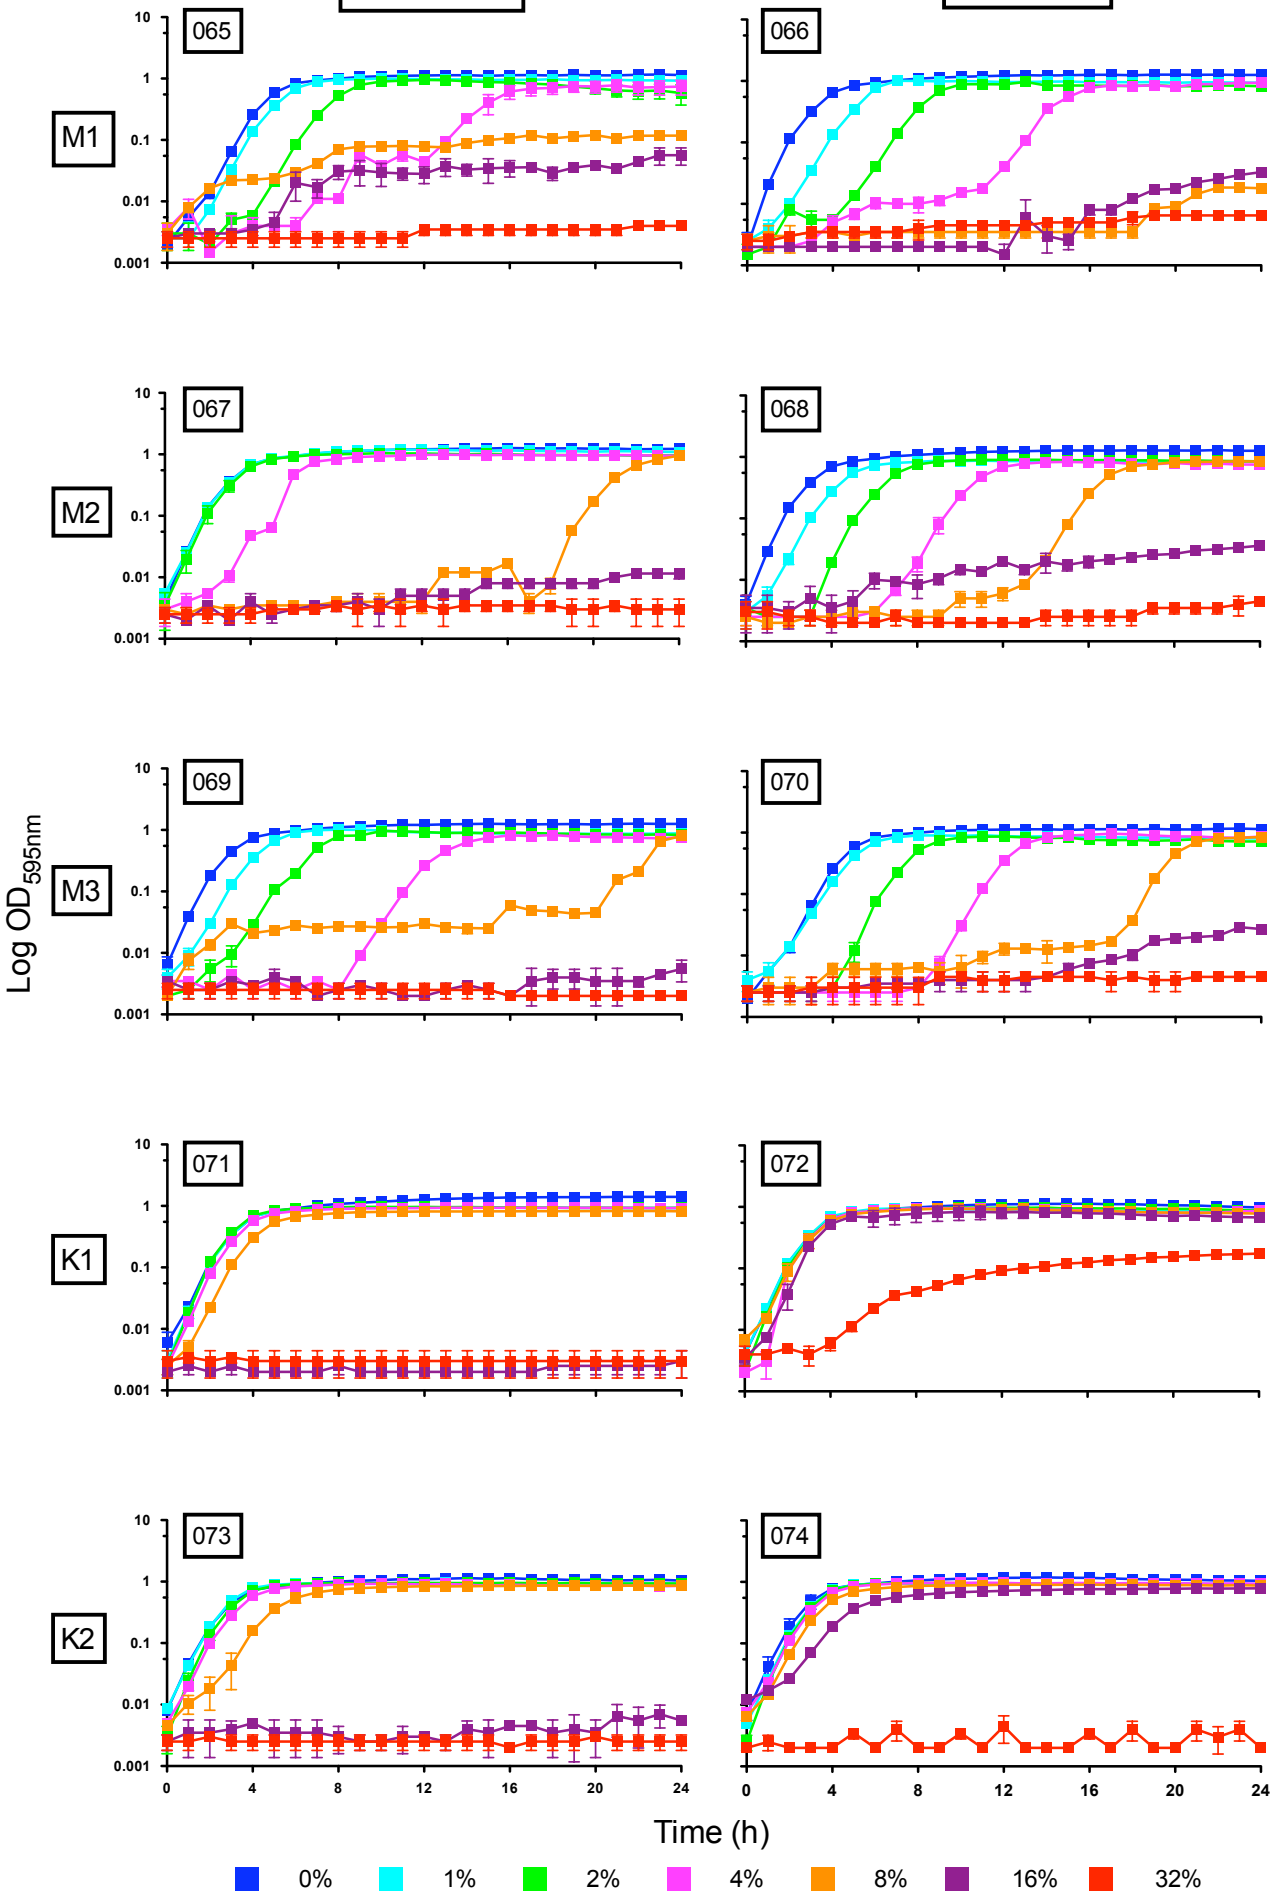

*S. aureus*

No catalase

+ Catalase

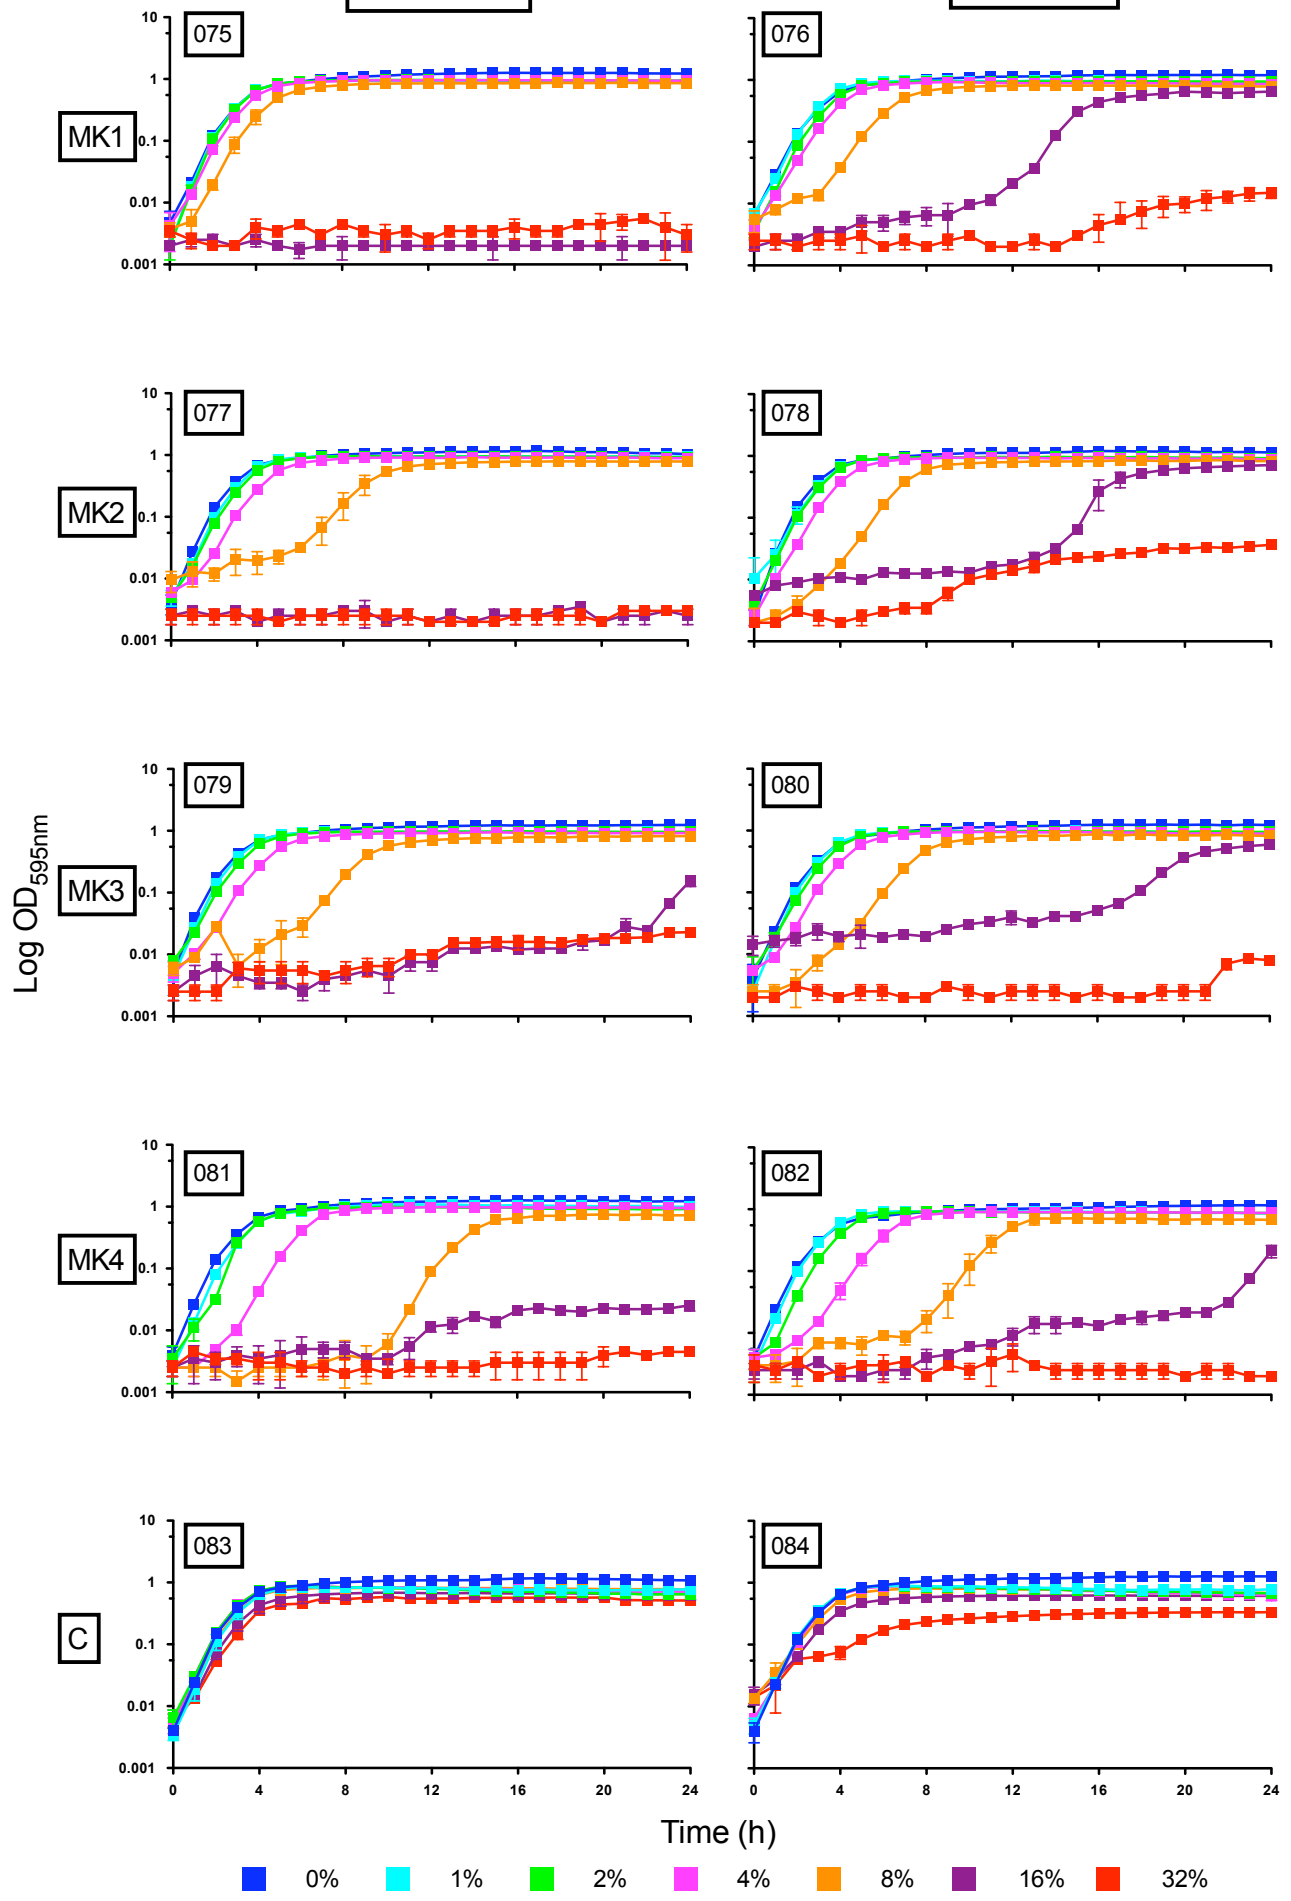

0% 1% 2% 4% 8% 16% 32%

*S. aureus*

No catalase

+ Catalase

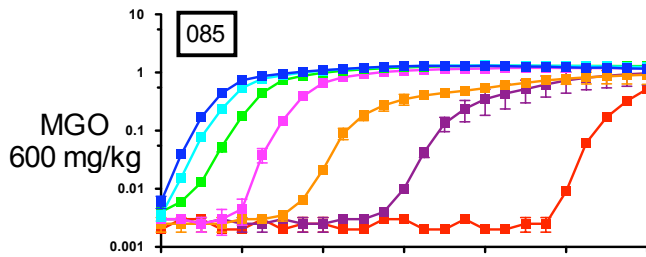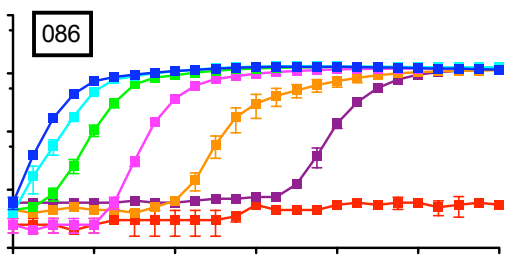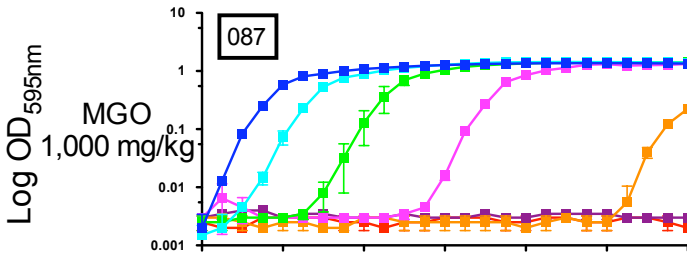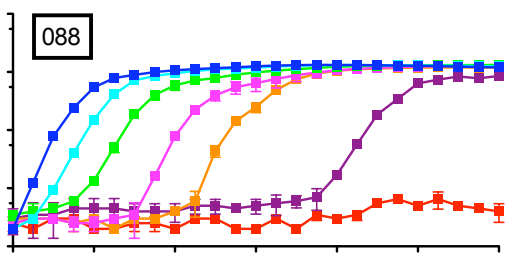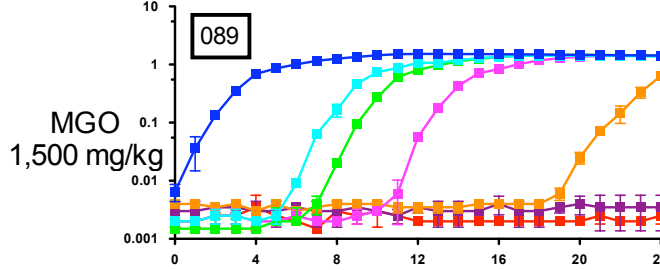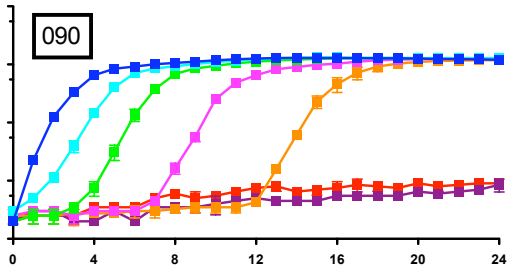

Time (h)

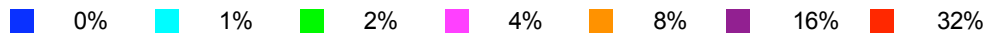

*S. aureus*

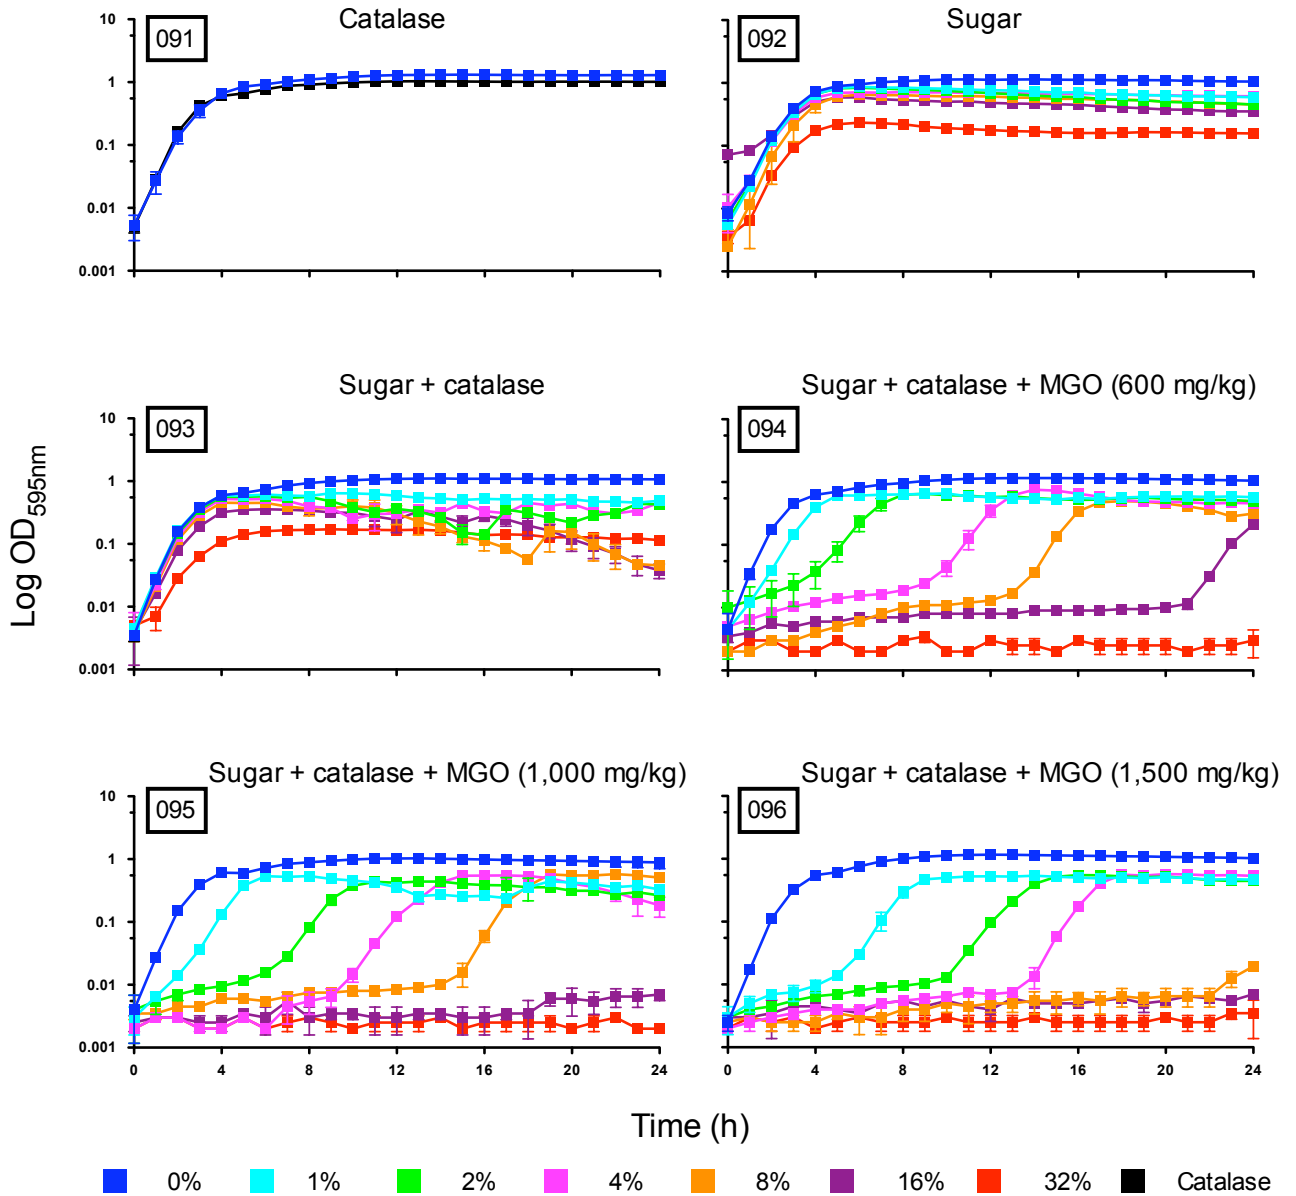

0% 1% 2% 4% 8% 16% 32% Catalase

*P. aeruginosa*

No catalase

+ Catalase

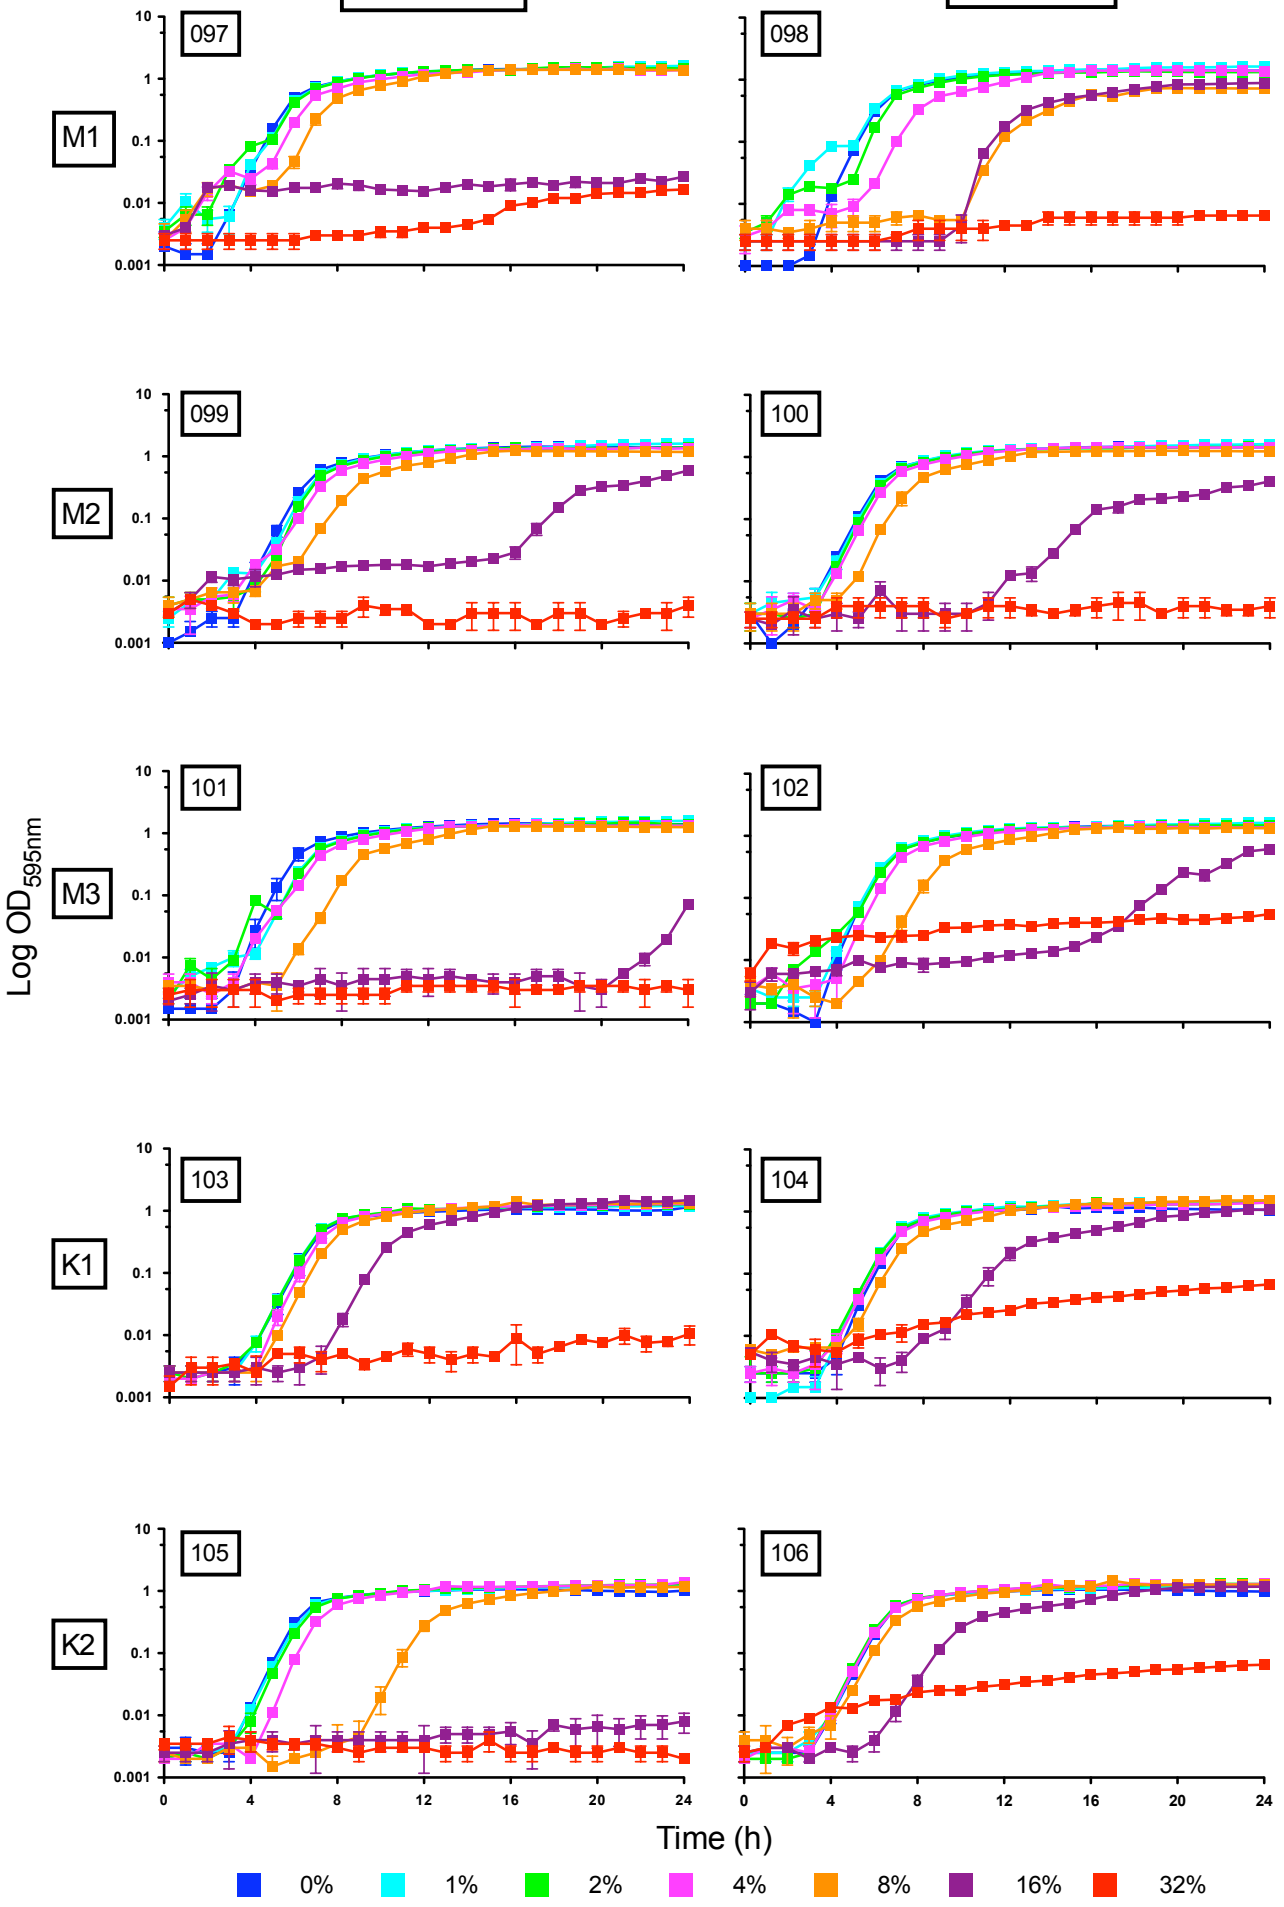

*P. aeruginosa*

No catalase

+ Catalase

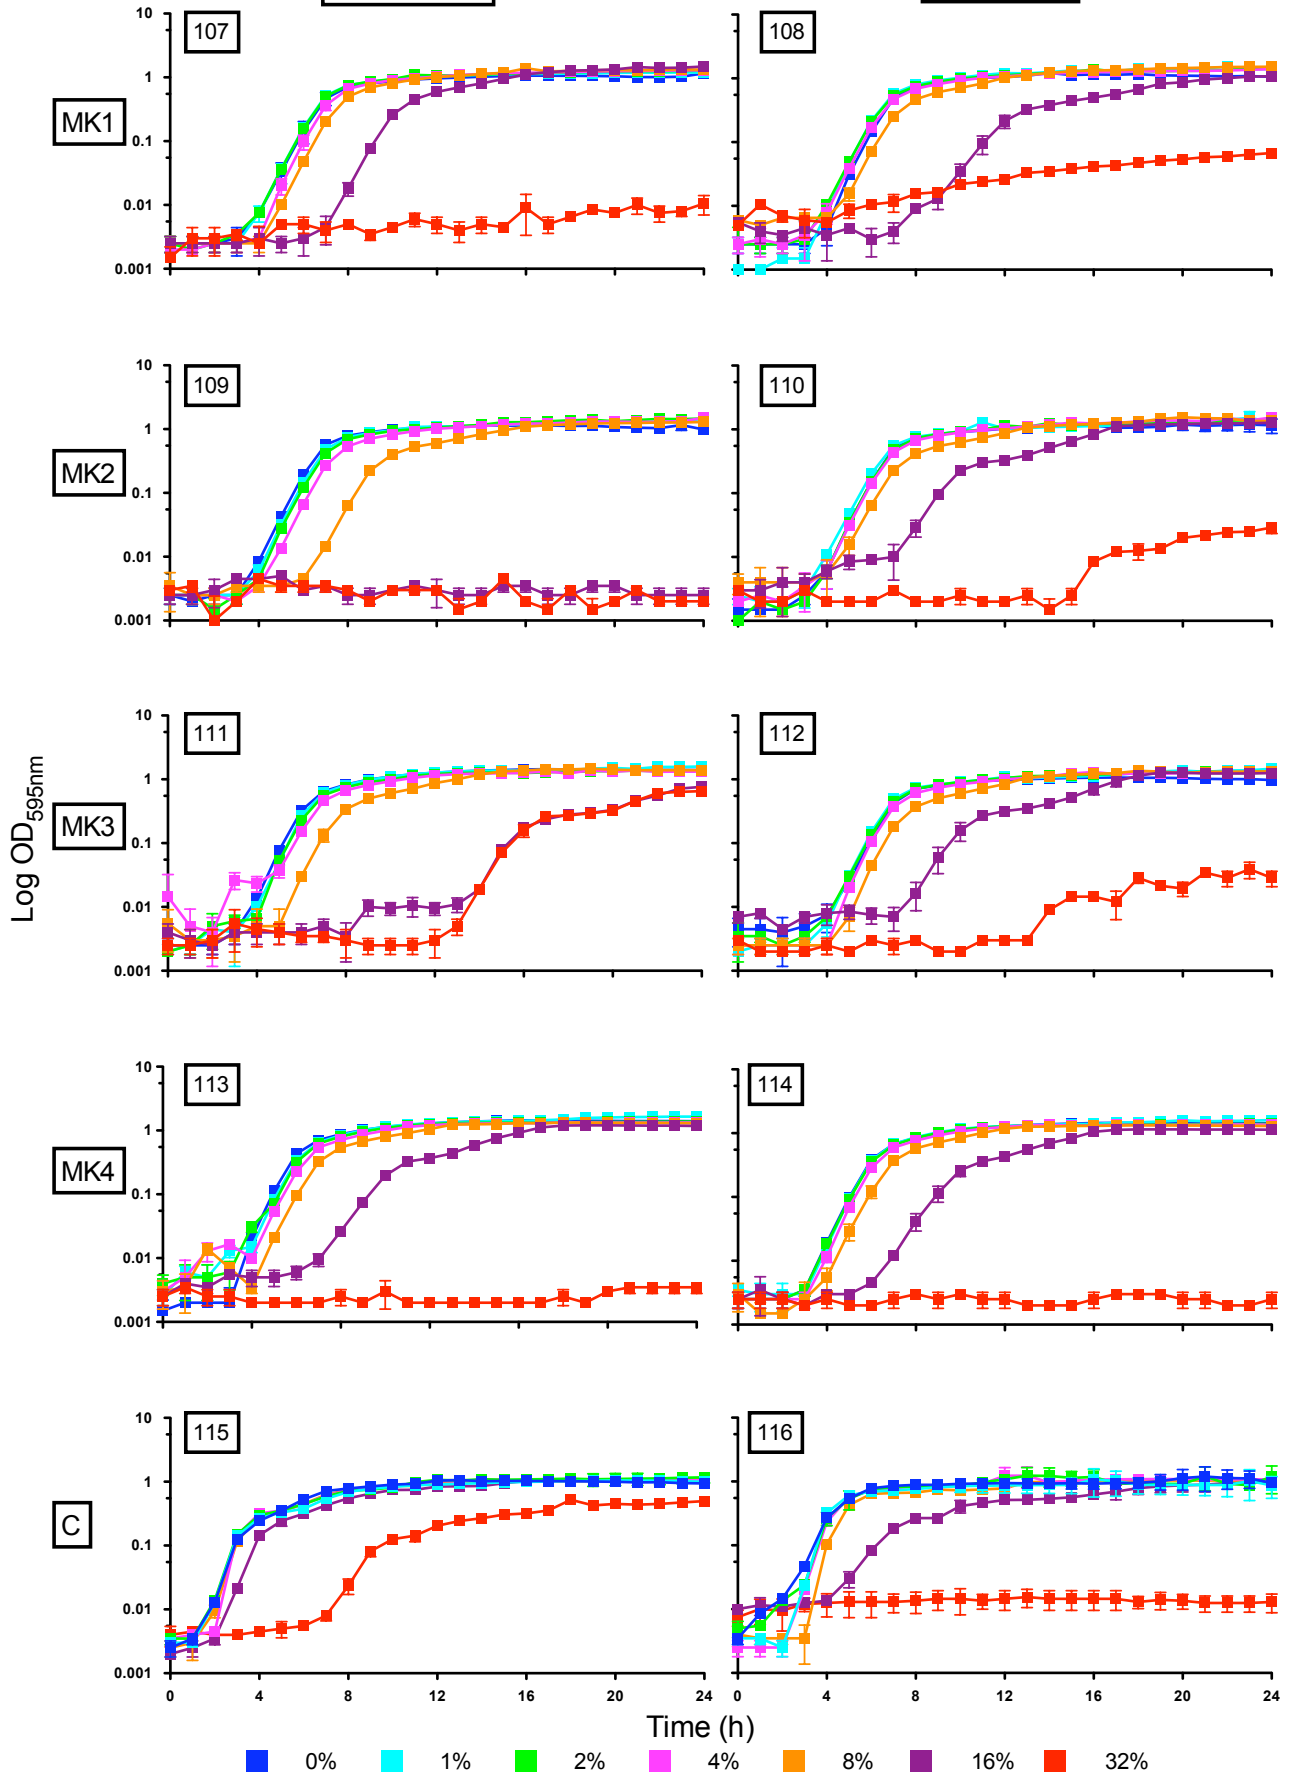

*P. aeruginosa*

No catalase

+ Catalase

117

118

MGO  
600 mg/kg

Log OD<sub>595nm</sub>

MGO  
1,000 mg/kg

MGO  
1,500 mg/kg

121

122

Time (h)

0% 1% 2% 4% 8% 16% 32%

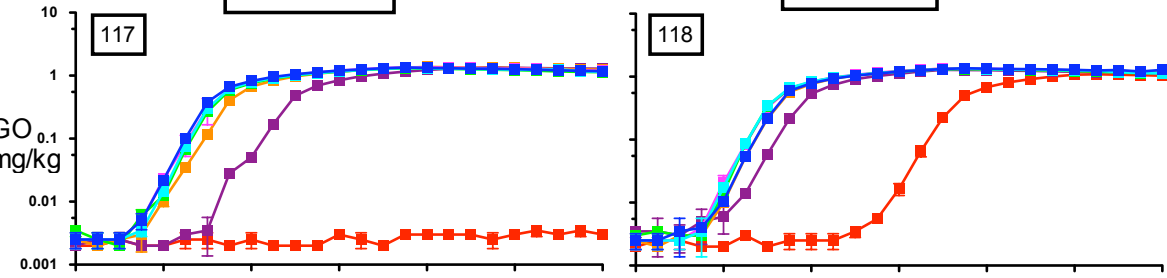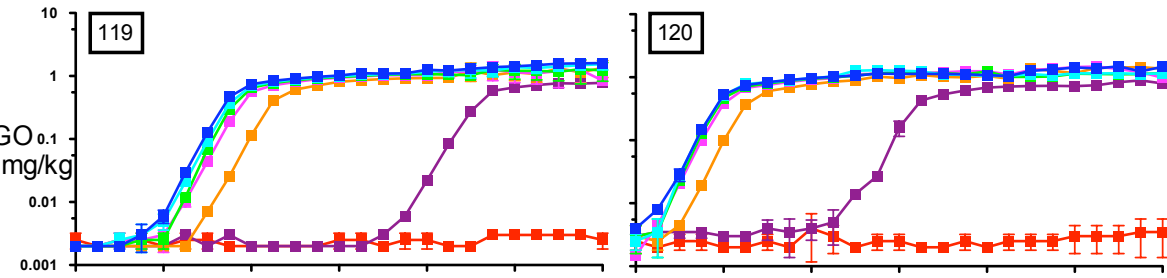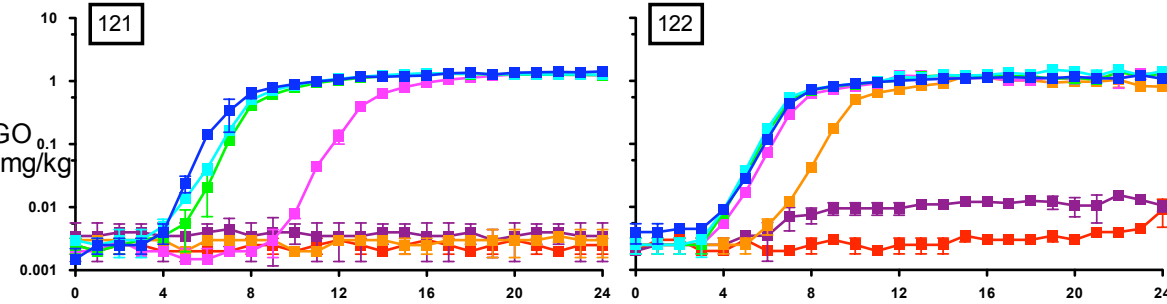

*P. aeruginosa*

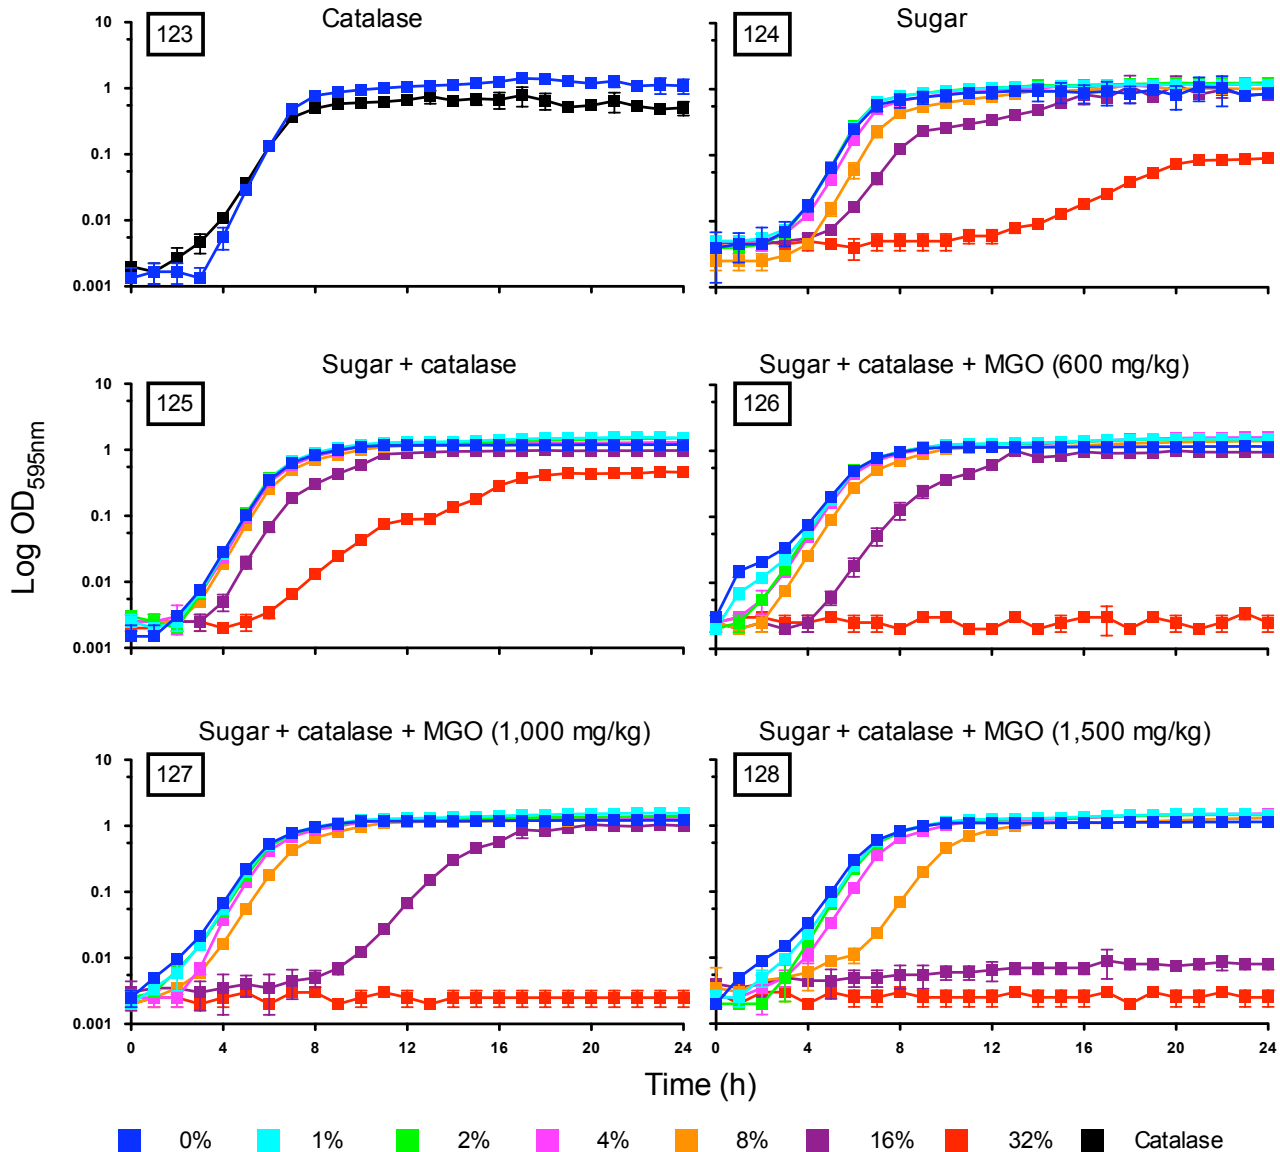

Supplement: pone.0055898.s001.pdf [file pone.0055898.s001.pdf]
